# Supplementary material for: Assessment of the phytotoxicity of HNTs on two plants, Cynodon dactylon and Brassica rapa L
Source: Royal Society of Chemistry journal article supplement (doi:10.1039/d3en00897e), 2024-01-01
Supplement: d3en00897e1.pdf [file d3en00897e1.pdf]

## Supplementary Information

### Assessment of the Phytotoxicity of HNTs on Two Plants, *Cynodon dactylon* and *Brassica rapa* L

*Ming Huang, Jiawei Huang, Haohong Yu, Qili Fangzhang, Mingxian Liu\**

Department of Materials Science and Engineering, College of Chemistry and  
Materials Science, Jinan University, Guangzhou 511443, China

\* Corresponding authors, Email: [liumx@jnu.edu.cn](mailto:liumx@jnu.edu.cn)

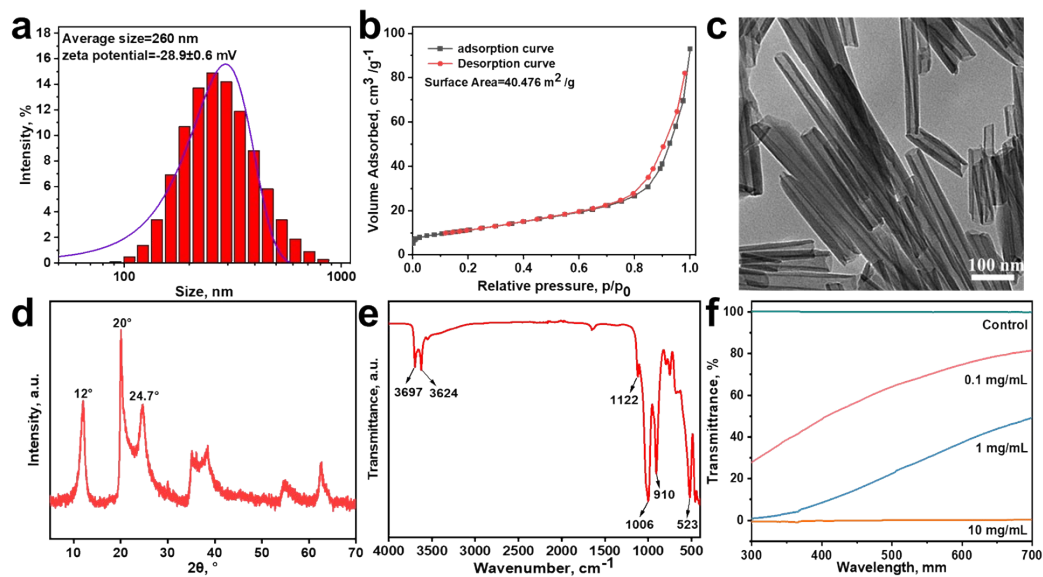

**Fig. S1.** The particle size distribution and zeta potential (a), nitrogen adsorption-desorption isotherm (b), TEM image (c), XRD patterns (d), and FT-IR spectra (e). The optical transmittance of different concentrations of HNTs dispersion (f).

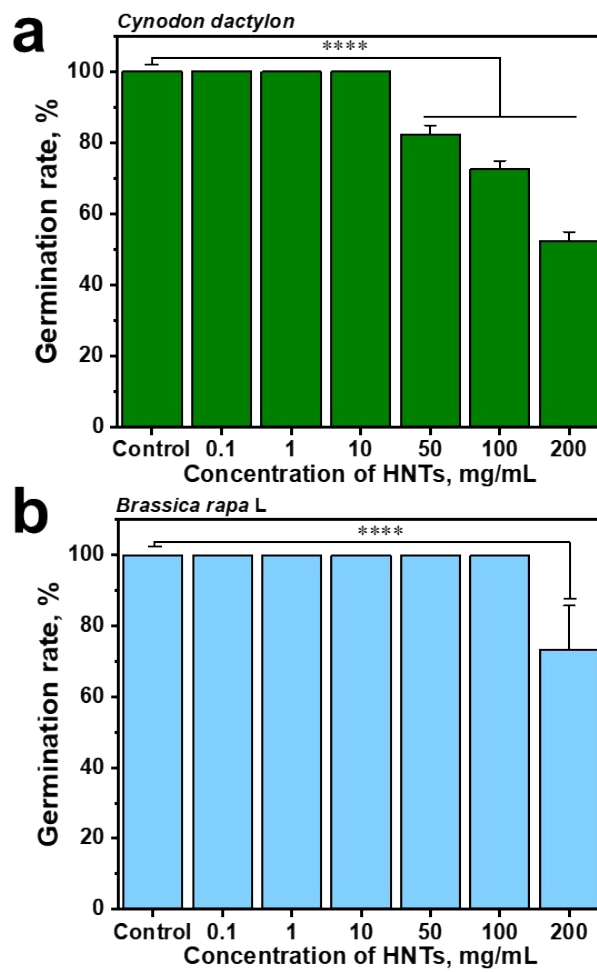

**Fig. S2.** Germination rates of *Cynodon dactylon* (a) and *Brassica rapa L* (b) under different concentrations of HNTs dispersion.

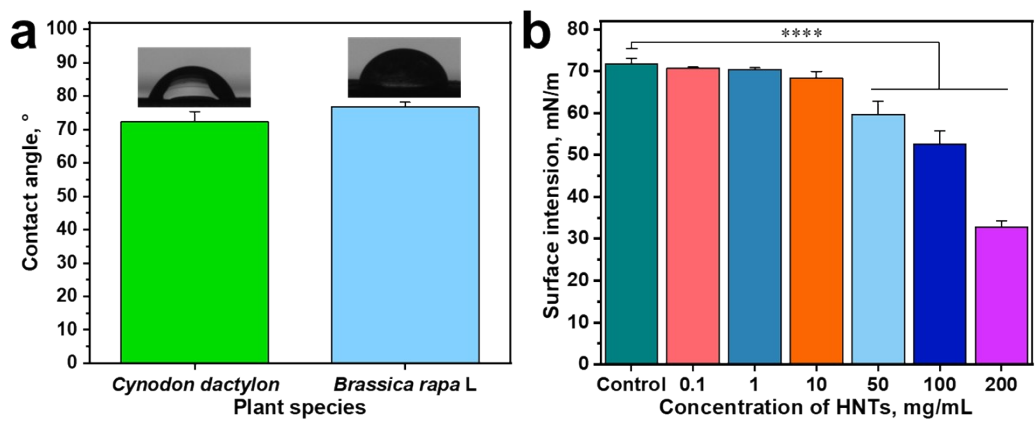

**Fig. S3.** The contact angle of *Cynodon dactylon* and *Brassica rapa* L with water (a), and the surface tension of different concentrations of HNTs dispersion (b).

## *Cynodon dactylon*

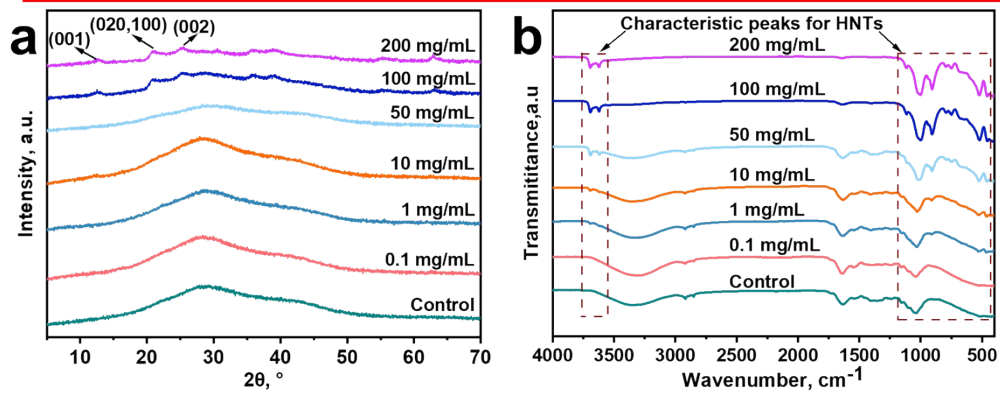

## *Brassica rapa L*

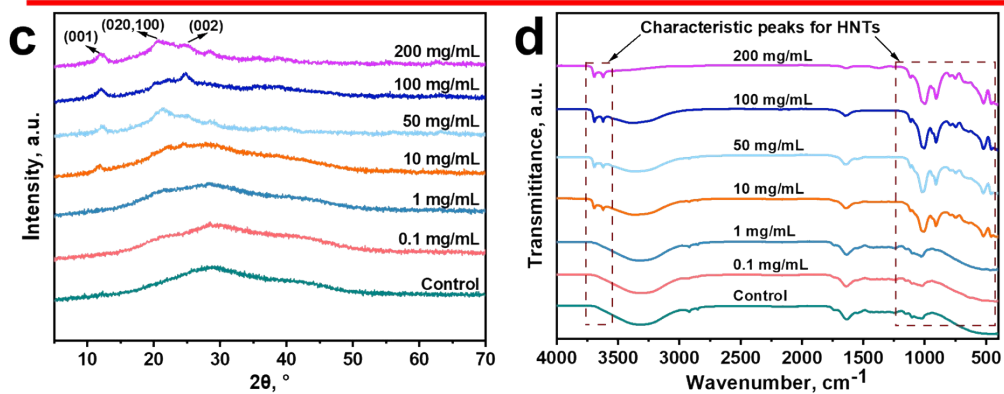

**Fig. S4.** The XRD (a) and FT-IR (b) of *Cynodon dactylon*, and the XRD (c) and FT-IR (d) of *Brassica rapa L* by foliar spraying with HNTs dispersion at different concentrations after 3 days.

Undersurface of *Cynodon dactylon* leaf (200 mg/mL)

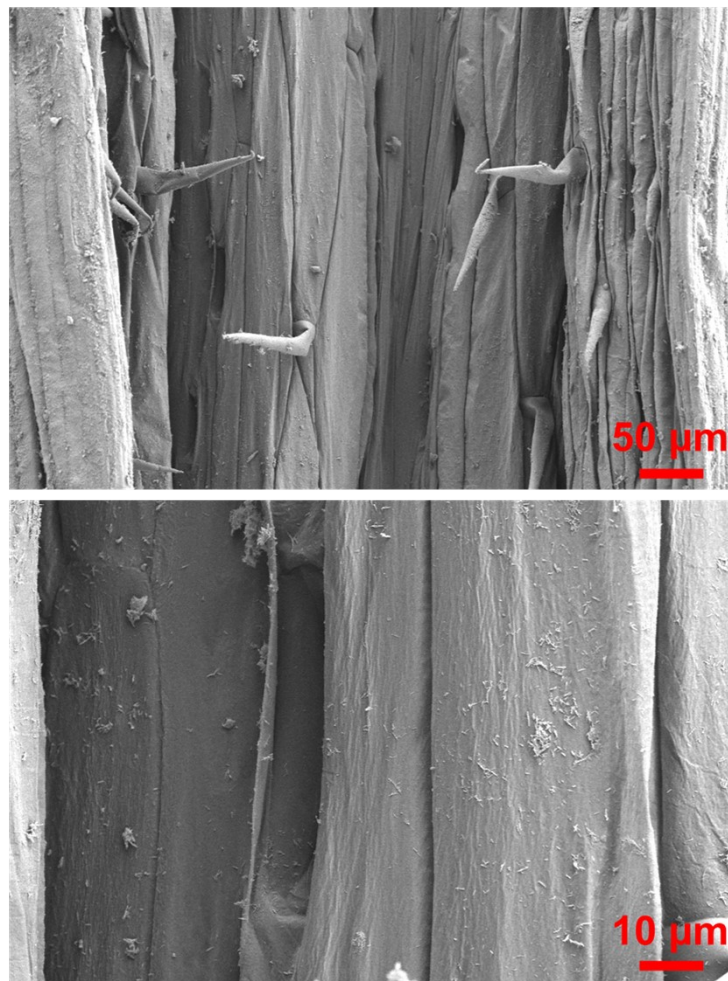

Fig. S5. The SEM image of the undersurface of *Cynodon dactylon* leaf treated with 200 mg/mL HNTs dispersion.
